# Supplementary material
Source: PubMed Central journal article supplement (PMC8257555)
Supplement: heartjnl-2020-318028supp001.pdf [file heartjnl-2020-318028supp001.pdf]

**Supplementary material:****Table S1.** Pattern of Beta-blocker use among patients discharged with a diagnosis of Takotsubo syndrome

|                                                                                                                                           | <b>Full cohort (n=519)</b> | <b>Survival free of recurrence (n=402)</b> | <b>Death or recurrence (n=117)</b> | <b>P value</b> |
|-------------------------------------------------------------------------------------------------------------------------------------------|----------------------------|--------------------------------------------|------------------------------------|----------------|
| <b>Baseline use:</b><br><b>Beta-blocker prescription prior to index admission*</b>                                                        | 102 (19.7)                 | 77 (19.2)                                  | 25 (21.4)                          | 0.60           |
| <b>First year of diagnosis:</b><br><b>At least one beta-blocker prescription filled within one year of index admission</b>                | 447 (86.1)                 | 356 (88.6)                                 | 91 (77.8)                          | 0.003          |
| <b>Persistent use after one year of diagnosis:</b><br><b>At least one beta-blocker prescription filled one-year after index admission</b> | 337 (64.9)                 | 272 (67.7)                                 | 65 (55.6)                          | 0.016          |
| <b>Persistent use at the end of follow-up:</b><br><b>Beta-blocker use at the end of the follow-up period †</b>                            | 260 (50.1)                 | 211 (52.5)                                 | 49 (41.9)                          | 0.043          |
| <b>Proportion of days covered (PDC):</b><br><b>Beta-blocker PDC during the entire follow-up period ‡</b>                                  | 0.57 ± 0.41                | 0.59 ± 0.41                                | 0.50 ± 0.39                        | 0.047          |
| <b>Adherence:</b><br><b>Beta-blocker PDC ≥ 80% ^</b>                                                                                      | 254 (48.9)                 | 212 (52.7)                                 | 42 (35.9)                          | 0.001          |
| <b>Dose:</b><br><b>Medium to high beta-blocker dose §</b>                                                                                 | 94 (18.1)                  | 72 (17.9)                                  | 22 (18.8)                          | 0.83           |

values are n(%) or mean ± standard deviation

\* defined as at least one beta-blocker prescription filled within 3 months prior to the index admission.

† defined as having a least one beta-blocker prescription filled within 3 months prior to the end of follow-up (follow-up ends at the time of death, time of recurrence or the end of the study).

‡ defined as the “days supply of medication dispensed to the patient” divided by the “total follow-up time”

^ defined as number of patients whose proportion of days covered is >80%

§ Medium to high beta-blocker dose is defined as the equivalent or higher than carvedilol 12.5mg twice a day.

**Figure S1.** Number of days to first recurrence of takotsubo syndrome.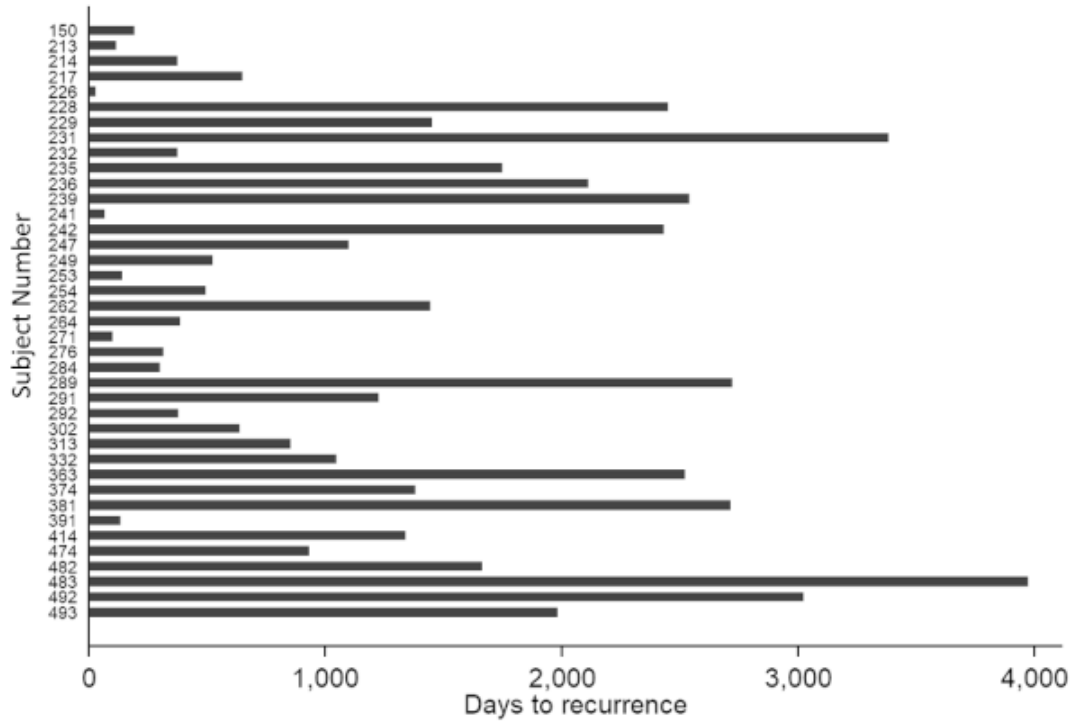

**Figure S2.** Beta-blocker prescription pattern based on proportion of days covered during the entire follow-up period

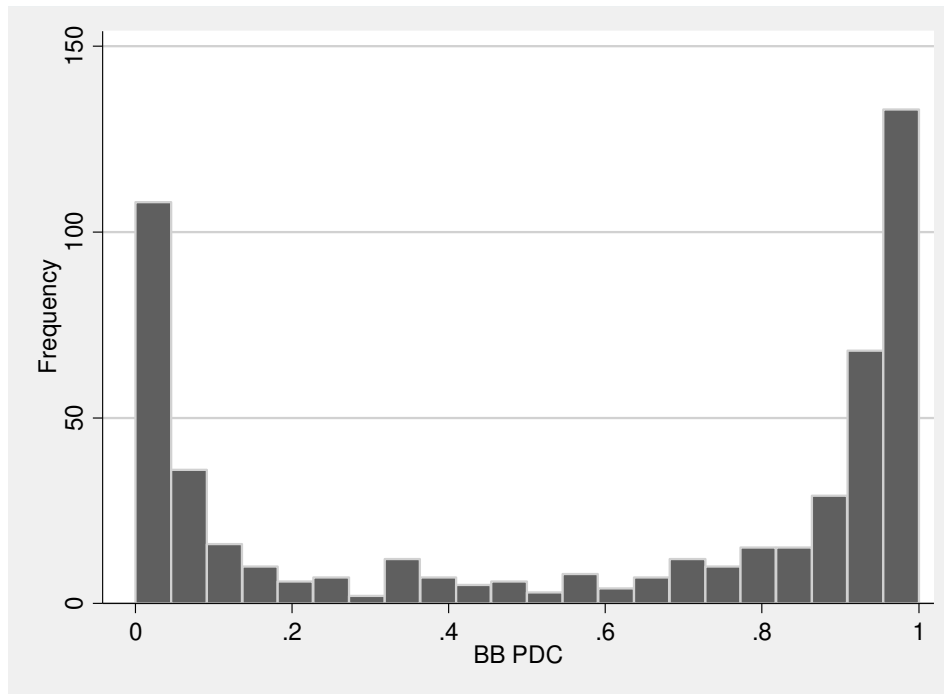

**Table S2.** Association between beta-blocker use and recurrence or death.

|                                                                                    | Univariable      |         | Multivariable*   |         |
|------------------------------------------------------------------------------------|------------------|---------|------------------|---------|
|                                                                                    | HR (95% CI)      | P value | HR (95% CI)      | P value |
| <b>BB use within 1 year of diagnosis (all patients)</b>                            | 0.53 (0.35-0.83) | 0.005   | 0.46 (0.29-0.72) | 0.001   |
| <b>BB use within 1 year of diagnosis (excluding patients with baseline BB use)</b> | 0.54 (0.33-0.88) | 0.013   | 0.53 (0.32-0.86) | 0.011   |
| <b>BB proportion of days covered (PDC) <math>\geq</math> 80%</b>                   | 0.51 (0.35-0.74) | 0.001   | 0.40 (0.27-0.59) | <0.001  |
| <b>BB proportion of days covered (per 10% increase)</b>                            | 0.95 (0.91-0.99) | 0.018   | 0.92 (0.88-0.96) | <0.001  |

\* Multivariable analyses were adjusted for age, sex, diabetes, chronic obstructive pulmonary disease / asthma, and chronic kidney disease.

† BB dose measured per mg increase in carvedilol dose.

BB = beta-blockers

**Table S3.** Univariable and Multivariable Models using Joint Survival and Longitudinal (Time-Varying) Exposure Modeling for Assessing the Association of Beta-Blocker Proportion of Days Covered with Recurrence or Death

|                                                                   | Univariable      |         | Multivariable Model* |         |
|-------------------------------------------------------------------|------------------|---------|----------------------|---------|
|                                                                   | HR (95% CI)      | P Value | HR (95% CI)          | P Value |
| <b>Beta-blocker proportion of days covered (per 10% increase)</b> | 0.84 (0.77-0.92) | <0.001  | 0.78 (0.71-0.85)     | <0.001  |

HR=hazard ratio; CI=confidence interval. \* multivariable modeling included the following variables: age, male, diabetes, chronic kidney disease and pulmonary disease.

**Table S4.** Characteristics of stress cardiomyopathy cohort stratified by beta-blocker proportion of days covered (BB PDC) <80% vs. ≥80%. unadjusted and IPTW-adjusted.

| Characteristic                | Unweighted Cohorts     |                        |             | IPTW-weighted cohorts  |                        |             |
|-------------------------------|------------------------|------------------------|-------------|------------------------|------------------------|-------------|
|                               | BB PDC < 80% (n = 265) | BB PDC ≥ 80% (n = 254) | Std Diff, % | BB PDC < 80% (n = 265) | BB PDC ≥ 80% (n = 254) | Std Diff, % |
| Age, Mean (SD)                | 66.5 (11.73)           | 70.0 (10.74)           | 30.6        | 68.3 (11.49)           | 68.5 (11.23)           | 1.7         |
| Male, n (%)                   | 21 (7.9%)              | 14 (5.5%)              | 9.6         | 19 (7%)                | 18 (7%)                | 0.1         |
| White, n (%)                  | 168 (63.4%)            | 164 (64.6%)            | 2.4         | 170 (64%)              | 161 (63.4%)            | 1.4         |
| Income ≤ \$45k, n (%)         | 66 (24.9%)             | 55 (21.7%)             | 7.7         | 62 (23.2%)             | 60 (23.5%)             | 0.7         |
| Diabetes, n (%)               | 47 (17.7%)             | 64 (25.2%)             | 18.2        | 59 (22.3%)             | 56 (22.2%)             | 0.4         |
| Pulmonary Disease, n (%)      | 73 (27.5%)             | 62 (24.4%)             | 7.2         | 4 (1.3%)               | 3 (1%)                 | 0.2         |
| Chronic kidney disease, n (%) | 38 (14.3%)             | 43 (16.9%)             | 7.1         | 43 (16.1%)             | 42 (16.4%)             | 0.9         |
| Hyperlipidemia, n (%)         | 134 (50.6%)            | 165 (65%)              | 29.5        | 153 (57.8%)            | 148 (58.2%)            | 0.8         |
| History of stroke, n (%)      | 23 (8.7%)              | 30 (11.8%)             | 10.3        | 29 (10.9%)             | 28 (11%)               | 0.4         |
| Hypertension, n (%)           | 153 (57.7%)            | 195 (76.8%)            | 41.4        | 179 (67.6%)            | 173 (68.3%)            | 1.5         |
| Dementia, n (%)               | 2 (0.8%)               | 3 (1.2%)               | 4.4         | 2 (0.8%)               | 2 (0.9%)               | 1.5         |
| Pulmonary Disease, n (%)      | 73 (27.5%)             | 62 (24.4%)             | 7.2         | 69 (26%)               | 66 (25.9%)             | 0.2         |
| Rheumatic Disease, n (%)      | 16 (6%)                | 10 (3.9%)              | 9.7         | 13 (4.9%)              | 12 (4.6%)              | 1.5         |
| Neurologic Disorder, n (%)    | 19 (7.2%)              | 20 (7.9%)              | 2.7         | 22 (8.3%)              | 19 (7.5%)              | 3           |
| Hypothyroidism, n (%)         | 44 (16.6%)             | 44 (17.3%)             | 1.9         | 45 (17%)               | 41 (16.2%)             | 2.3         |
| Liver Disease, n (%)          | 7 (2.6%)               | 10 (3.9%)              | 7.3         | 7 (2.8%)               | 9 (3.6%)               | 4.7         |
| Obesity, n (%)                | 50 (18.9%)             | 61 (24%)               | 12.6        | 58 (22%)               | 56 (21.9%)             | 0.2         |
| Depression, n (%)             | 78 (29.4%)             | 75 (29.5%)             | 0.2         | 80 (30.1%)             | 74 (29.3%)             | 1.8         |

**Table S5.** Association between beta-blocker use and recurrence or death.

|                                                                  | <b>Unadjusted</b>  |                | <b>IPTW-adjusted</b> |                |
|------------------------------------------------------------------|--------------------|----------------|----------------------|----------------|
|                                                                  | <b>HR (95% CI)</b> | <b>P value</b> | <b>HR (95% CI)</b>   | <b>P value</b> |
| <b>BB proportion of days covered (PDC) <math>\geq</math> 80%</b> | 0.51 (0.35-0.74)   | <0.001         | 0.45 (0.31-0.66)     | <0.001         |

BB = beta-blockers
